# Supplementary material for: Ground-based imaging remote sensing of ice clouds: uncertainties caused by sensor, method and atmosphere
Source: Copernicus journal article supplement (doi:10.5194/amt-9-4615-2016), 2016-09-20
Supplement: Supplementary file 1 [file amt-9-4615-2016-supplement.zip]

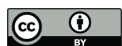

## *Supplement of*

# **Ground-based imaging remote sensing of ice clouds: uncertainties caused by sensor, method and atmosphere**

**Tobias Zinner et al.**

*Correspondence to:* Tobias Zinner (tobias.zinner@lmu.de)

- amt-9-4615-2016-supplement-title-page.pdf
- retrieval\_20121002\_UTC08:08\_L50\_100.cdf
- retrieval\_20121002\_UTC08:56\_L50\_100.cdf
- retrieval\_20121002\_UTC09:52\_L50\_100.cdf
- retrieval\_20121003\_UTC14:47\_L50\_100.cdf
- retrieval\_20121003\_UTC15:08\_L50\_100.cdf

The copyright of individual parts of the supplement might differ from the CC-BY 3.0 licence.
